# Supplementary material for: Endovascular intervention for basilar artery occlusion in the elderly
Source: PubMed Central journal article supplement — Ther Adv Neurol Disord. 2021 Apr 12;14:17562864211000453. doi: 10.1177/17562864211000453 (PMC8047973; doi:10.1177/17562864211000453), 2021-04-12
Supplement: sj-pdf-1-tan-10.1177_17562864211000453.pdf [file sj-pdf-1-tan-10.1177_17562864211000453.pdf]

# **Endovascular Intervention for Basilar Artery Occlusion in the Elderly**

## **SUPPLEMENTAL MATERIAL**

### **Contents**

|                                                                             |          |
|-----------------------------------------------------------------------------|----------|
| <b>Table I. Baseline Characteristics of Patients with Intervention.....</b> | <b>1</b> |
| <b>Figure I. Predicted probability of outcome with age and NIHSS .....</b>  | <b>2</b> |

**Table I. Baseline Characteristics of Patients with Intervention**

| Characteristics                    | All patients<br>(n=647) | Age <75<br>(n=520) | Age ≥75<br>(n=127) | P Value |
|------------------------------------|-------------------------|--------------------|--------------------|---------|
| Age, median (IQR), years           | 64 (56-73)              | 62 (54-67)         | 78 (76-81)         | <0.001  |
| Sex, male, No. (%)                 | 483 (74.7)              | 404 (77.7)         | 79 (62.2)          | <0.001  |
| NIHSS baseline score, median (IQR) | 27 (17-33)              | 26 (16-33)         | 28 (17-34)         | 0.054   |
| pc-ASPECTS baseline, median (IQR)  | 8 (7-9)                 | 8 (7-9)            | 8 (7-9)            | 0.634   |
| PC-CS score, median (IQR)          | 4 (3-6)                 | 5 (3-6)            | 4 (4-6)            | 0.924   |
| SBP, median (IQR), mm Hg           | 150 (134-166)           | 149 (133-166)      | 151 (138-171)      | 0.218   |
| DBP, median (IQR), mm Hg           | 85 (77-97)              | 85 (78-98)         | 83 (75-94)         | 0.090   |
| Medical history, No. (%)           |                         |                    |                    |         |
| Hypertension                       | 451 (69.7)              | 349 (67.1)         | 102(80.3)          | 0.004   |
| Hyperlipidemia                     | 214 (33.1)              | 193 (37.1)         | 21 (16.5)          | <0.001  |
| Diabetes mellitus                  | 149 (23.0)              | 125 (24.0)         | 24 (18.9)          | 0.217   |
| Atrial fibrillation                | 136 (21.0)              | 80 (15.4)          | 56 (44.1)          | <0.001  |
| Cerebral infarction                | 140 (21.6)              | 108 (20.8)         | 32 (25.2)          | 0.277   |
| Intracerebral hemorrhage           | 12 (1.9)                | 9 (1.7)            | 3 (2.4)            | 0.916   |
| Coronary artery disease            | 105 (16.2)              | 75 (14.4)          | 30 (23.6)          | 0.012   |
| Heart failure                      | 22 (3.4)                | 13 (2.5)           | 9 (7.1)            | 0.022   |
| Chronicbronchitis                  | 13 (2.0)                | 11 (2.1)           | 2 (1.6)            | 0.971   |
| current or ex-smoker               | 235 (36.3)              | 207/502 (39.8)     | 28 (22.0)          | <0.001  |
| Cause of stroke, No. (%)           |                         |                    |                    |         |
| Large artery atherosclerosis       | 418 (64.6)              | 362 (69.6)         | 56 (44.1)          | <0.001  |
| Cardioembolism                     | 173 (26.7)              | 108 (20.8)         | 65 (51.2)          |         |
| Other causes                       | 56 (8.7)                | 50 (9.6)           | 6 (4.7)            |         |
| Occlusion sites, No. (%)           |                         |                    |                    |         |
| Distal basilar artery              | 222 (34.3)              | 157 (30.2)         | 65 (51.2)          | <0.001  |
| Middle basilar artery              | 195 (30.1)              | 161 (31.0)         | 34 (26.8)          |         |
| Proximal basilar artery            | 107 (16.5)              | 94 (18.1)          | 13 (10.2)          |         |
| Vertebral artery-V4                | 123 (19.0)              | 108 (20.8)         | 15 (11.8)          |         |
| Procedural factors                 |                         |                    |                    |         |
| intravenous thrombolysis, No. (%)  | 119 (18.4)              | 97 (18.7)          | 22 (17.3)          | 0.729   |
| OTT, median (IQR), min             | 246 (132-390)           | 245 (127-401)      | 261 (151-365)      | 0.591   |
| OTP, median (IQR), min             | 328 (220-493)           | 330 (217-501)      | 315 (241-475)      | 0.703   |
| OTR, median (IQR), min             | 441 (328-627)           | 442 (329-645)      | 429 (310-587)      | 0.317   |
| PTR, median(IQR), min              | 105 (71-151)            | 107 (74-153)       | 99 (64-135)        | 0.067   |
| DTP, median(IQR), min              | 131 (88-200)            | 132 (88-199)       | 127 (85-205)       | 0.401   |
| DTR, median (IQR), min             | 247 (186-345)           | 250 (191-346)      | 237 (166-315)      | 0.063   |
| General anesthesia, No. (%)        | 257/639 (40.2)          | 220/516 (42.6)     | 37/123 (30.1)      | 0.011   |
| Successful recanalization, No. (%) | 522 (80.7)              | 418 (80.4)         | 104 (81.9)         | 0.700   |

OTT indicates Onset-treatment time; IQR: interquartile rage; NIHSS: National Institutes of Health Stroke Scale; pc-ASPECTS: posterior circulation-Alberta Stroke Program Early Computed Tomography Score; PC-CS score: posterior circulation collateral system score; SBP: Systolic blood pressure; DBP: Diastolic blood pressure; BAO: basilar artery occlusion; VA: vertebral artery;

OTP: onset-puncture time; OTR: Onset-recanalization time; PTR: puncture-recanalization time; DTP: door to puncture; DTR: door to recanalization

### Figure I. Predicted probability of outcome with age and NIHSS in elderly patients with intervention

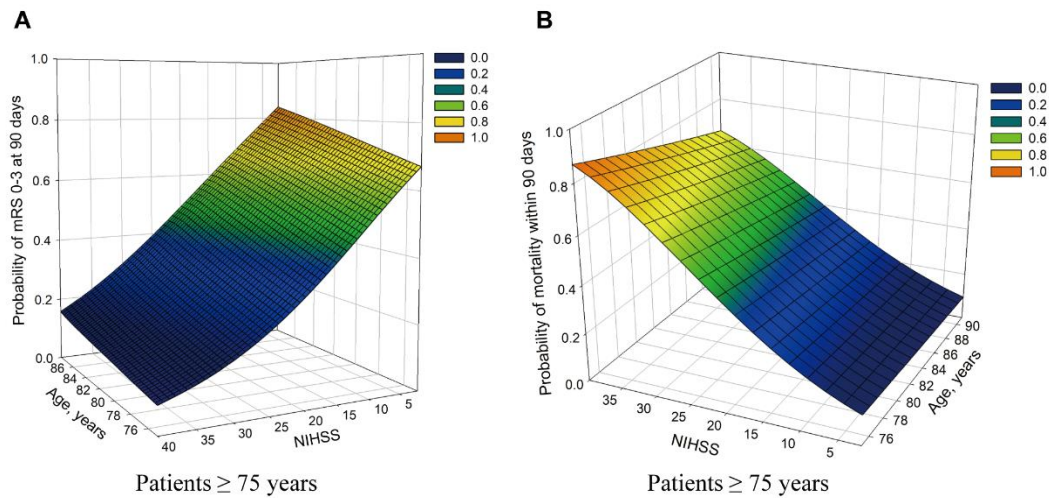

Figure I. Association of age and initial NIHSS with the probability of favorable functional outcome at 90 days (Panel A) and with the probability of mortality within 90 days (Panel B) in elderly patients with intervention. Both favorable functional outcome and mortality probability reduces with the initial NIHSS score while the outcome probability are stable over the age.
